# Supplementary material for: Nanodrug Transmembrane Transport Research Based on Fluorescence Correlation Spectroscopy
Source: MDPI journal article supplement (doi:10.3390/membranes11110891), 2021-11-19

# Nanodrug Transmembrane Transport Research Based on Fluorescence Correlation Spectroscopy

Xinwei Gao, Yanfeng Liu, Jia Zhang, Luwei Wang, Yong Guo, Yinru Zhu, Zhigang Yang, Wei Yan \* and Junle Qu

Center for Biomedical Photonics, Key Laboratory of Optoelectronic Devices and Systems of Ministry of Education and Guangdong Province, College of Physics and Optoelectronic Engineering, Shenzhen University, Shenzhen 518060, China; 1910454012@email.szu.edu.cn (X.G.); szu\_liuyanfang@163.com (Y.L.); julyzhang2021@163.com (J.Z.); wanglowell@szu.edu.cn (L.W.); 1800284004@email.szu.edu.cn (Y.G.); 2150453014@email.szu.edu.cn (Y.Z.); zhgyang@szu.edu.cn (Z.Y.); jlqu@szu.edu.cn (J.Q.)

\* Correspondence: weiyang@szu.edu.cn

**Figure S1.** The influence of the distance between the cover glass and the objective lens on the detection volume of the number of molecules(A), the diffusion time(B), and the brightness(C). The zero points is the position where the clear image of the cell is found in the image mode. The distance between the objective lens and the cover glass is defined as positive when the objective lens moves forward relative to the zero points, otherwise, it is negative. Error bars represent the standard deviation of 5 measurements.

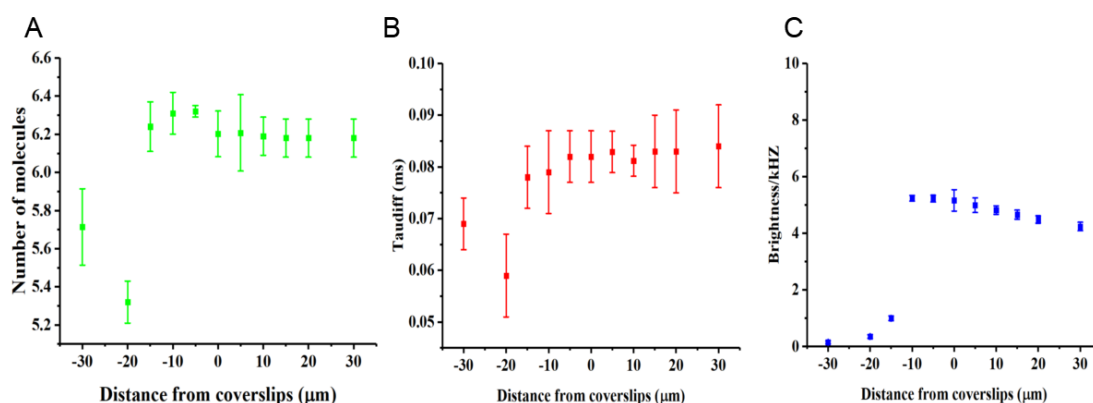

**Figure S2.** Rhodamine 6G (SNR = 5kHz) diffusion time in aqueous solution.

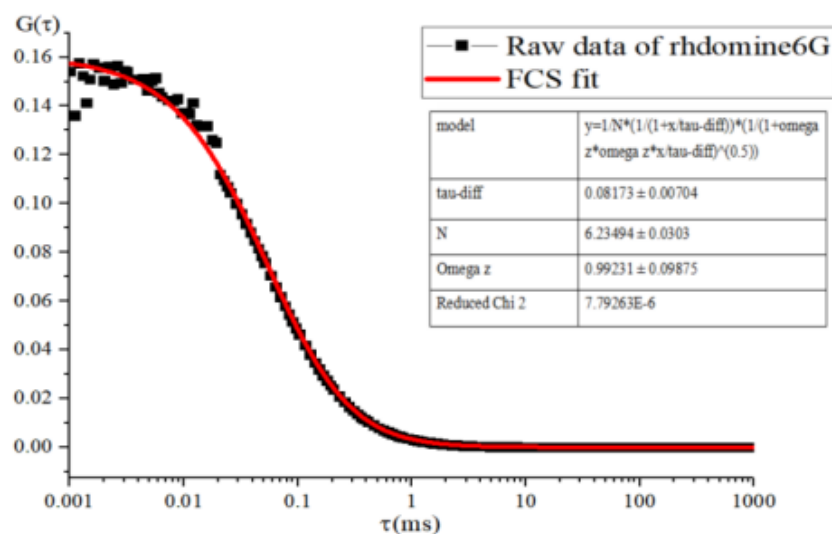

**Figure S3.** Plots of integrated intensity of CDs and rhodamine 6G as a function of optical absorbance at 420 nm and relevant data in deionied water.

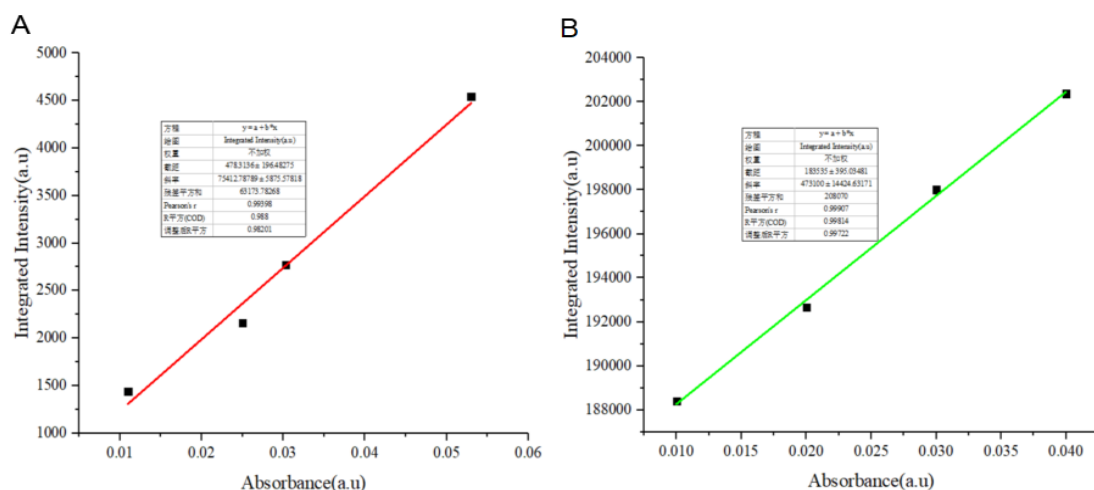

|                               | CDs    |        |        |       | Rhodamine 6G |        |        |        |
|-------------------------------|--------|--------|--------|-------|--------------|--------|--------|--------|
| Abs                           | 0.011  | 0.0025 | 0.0303 | 0.053 | 0.011        | 0.021  | 0.0303 | 0.0405 |
| Integrated Intensity          | 1440   | 2160   | 2770   | 4540  | 188390       | 192670 | 198810 | 202380 |
| Excitation ( $\lambda_{ex}$ ) | 420 nm |        |        |       | 420 nm       |        |        |        |
| Slope                         | 75412  |        |        |       | 473100       |        |        |        |
| QY (%)                        | 14.48  |        |        |       | 95           |        |        |        |

**Figure S4.** The information of the FCS measurements of CDs in U<sub>2</sub>OS Cells. (A) The measurement position (yellow mark) in U<sub>2</sub>OS cells of CDs. (B, C) The raw data of FCS measurements in U<sub>2</sub>OS at 5 min (B) and 30 min(C), respectively. The scale bar is 10  $\mu$ m.

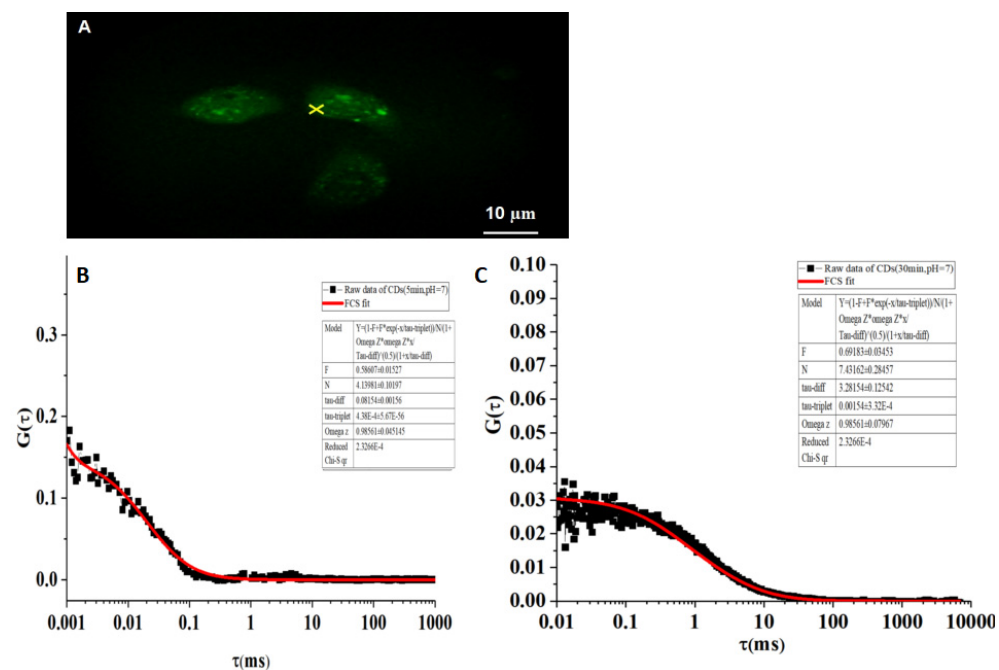

**Figure S5.** Transmembrane process of FCS measurements of DOX. (A) The measurement point of FCS in U<sub>2</sub>OS Cells, the green mark present measurement position. (B, C) The raw data of FCS measurement at 5 min (B) and 30 min (C), respectively.

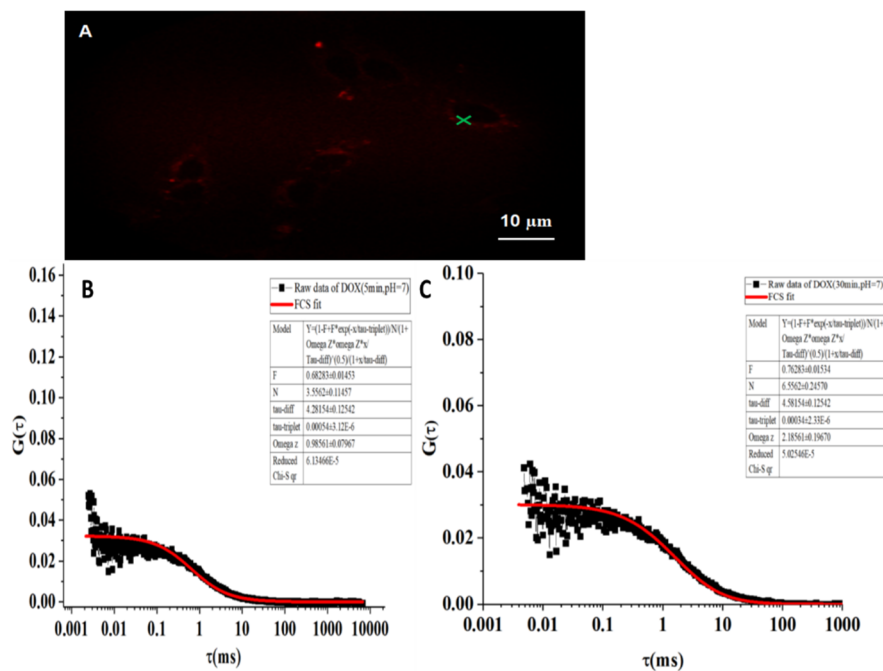

Figure 2 consists of two line graphs, A and B, showing the time course of fluorescence quenching. The y-axis for both is 'Tautdiff(ms)' and the x-axis is 'Time(min)'. Graph A shows three data series: CDs(Ph7) (black squares), DOX(Ph7) (red circles), and CDs-DOX(Ph7) (blue triangles). Graph B shows two data series: CDs (Ph7) (black squares) and CDs-DOX(Ph7) (red circles). Both graphs include error bars.

**Table A: Data for Figure 2A (Approximate values)**

| Time (min) | CDs(Ph7) (ms) | DOX(Ph7) (ms) | CDs-DOX(Ph7) (ms) |
|------------|---------------|---------------|-------------------|
| 5          | 0.022         | 0.018         | 0.082             |
| 6          | 0.032         | 0.015         | 0.078             |
| 7          | 0.030         | 0.010         | 0.082             |
| 8          | 0.028         | 0.010         | 0.080             |
| 9          | 0.080         | 0.015         | 0.082             |
| 10         | 0.030         | 0.012         | 0.082             |
| 11         | 0.032         | 0.010         | 0.085             |
| 12         | 0.032         | 0.050         | 0.082             |
| 13         | 0.035         | 0.025         | 0.080             |

**Table B: Data for Figure 2B (Approximate values)**

| Time (min) | CDs (Ph7) (ms) | CDs-DOX(Ph7) (ms) |
|------------|----------------|-------------------|
| 5          | 0.078          | 0.058             |
| 6          | 0.082          | 0.055             |
| 7          | 0.080          | 0.052             |
| 8          | 0.080          | 0.048             |
| 9          | 0.082          | 0.048             |
| 10         | 0.075          | 0.048             |
| 11         | 0.082          | 0.048             |
| 12         | 0.082          | 0.050             |
| 13         | -              | 0.052             |
| 14         | -              | 0.055             |
| 15         | -              | 0.055             |
| 16         | -              | 0.055             |
| 17         | -              | 0.032             |
| 18         | -              | 0.058             |
| 19         | -              | 0.058             |
| 20         | -              | 0.058             |

**A**

10  $\mu\text{m}$

**B**

Legend:   
 ■ Raw data of CD45-DOX(5min, pH=7)   
 — FCS fit

| Model                   | $Y = (1-F + F \cdot \exp(-x/\tau_{\text{triplet}})) / N(1 + \Omega \tau \cdot \exp(-x/\tau_{\text{diff}}) (0.5)(1+x/\tau_{\text{diff}}))$ |
|-------------------------|-------------------------------------------------------------------------------------------------------------------------------------------|
| F                       | 0.57989 ± 0.02927                                                                                                                         |
| N                       | 3.13682 ± 0.2045                                                                                                                          |
| $\tau_{\text{diff}}$    | 0.05125 ± 0.0035                                                                                                                          |
| $\tau_{\text{triplet}}$ | 6.55E-4 ± 6.96E-5                                                                                                                         |
| $\Omega \tau$           | 1.9856 ± 0.45145                                                                                                                          |
| Reduced $\chi^2$        | 1.483E-4                                                                                                                                  |

**C**

Legend:   
 ■ Raw data of CD45-DOX(30min, pH=5)   
 — FCS fit

| Model                   | $Y = (1-F + F \cdot \exp(-x/\tau_{\text{triplet}})) / N(1 + \Omega \tau \cdot \exp(-x/\tau_{\text{diff}}) (0.5)(1+x/\tau_{\text{diff}}))$ |
|-------------------------|-------------------------------------------------------------------------------------------------------------------------------------------|
| F                       | 0.92183 ± 0.0153                                                                                                                          |
| N                       | 6.13172 ± 0.26547                                                                                                                         |
| $\tau_{\text{diff}}$    | 2.28154 ± 0.12542                                                                                                                         |
| $\tau_{\text{triplet}}$ | 0.00165 ± 1.22E-4                                                                                                                         |
| $\Omega \tau$           | 0.98561 ± 0.045145                                                                                                                        |
| Reduced $\chi^2$        | 2.3266E-4                                                                                                                                 |

**Figure S8.** Transmembrane process of FCS measurements of CDs-DOX. (A) the measurement point of FCS in COS7 Cells, the red mark presents measurement position. (B, C) the raw data of FCS measurement at 5 min (B) and 30 min (C).

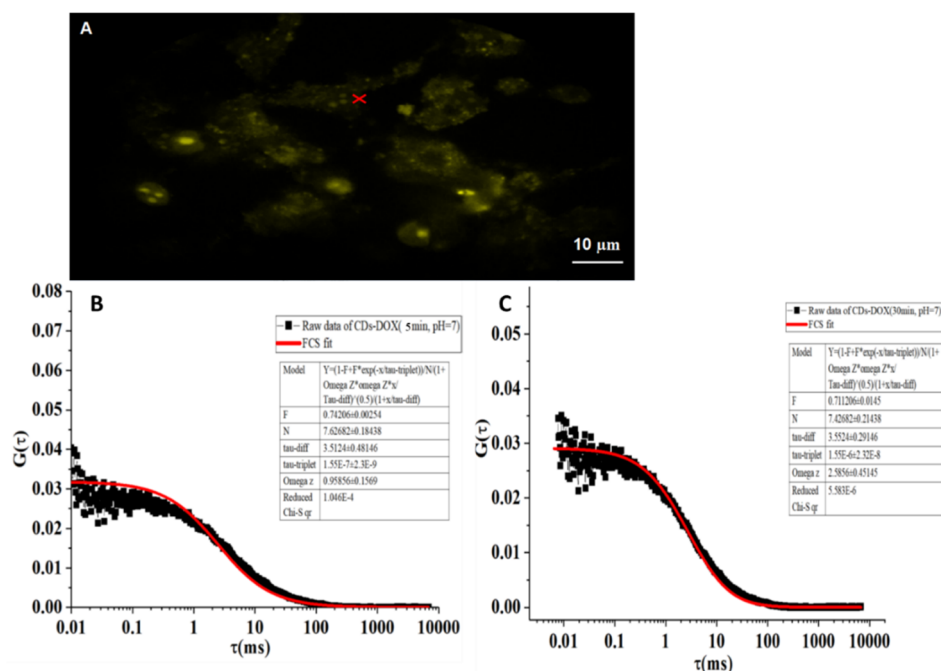

**Figure S9.** Transmembrane process of FCS measurements of CDs.(A) The measurement point of FCS in COS7 Cells, the green mark presents measurement position.(B, C) Data of FCS measurement at 5 min(B) and 30 min(C), respectively.

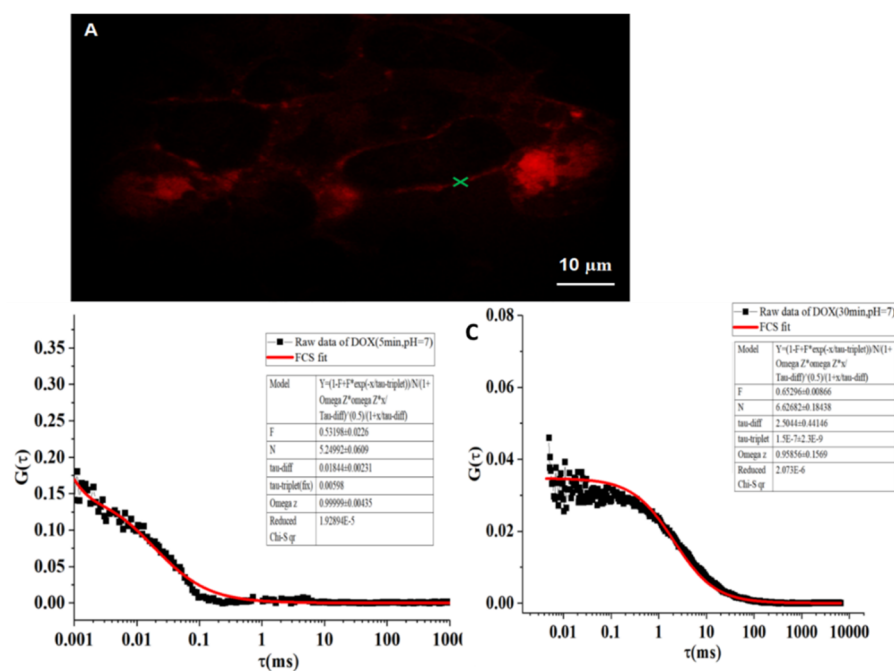

**Figure S10.** Transmembrane process of FCS measurements of DOX.(A) The measurement point of FCS in COS7 Cells, the green mark presents measurement position.(B, C) Data of FCS measurement at 5 min(B) and 30 min(C), respectively.

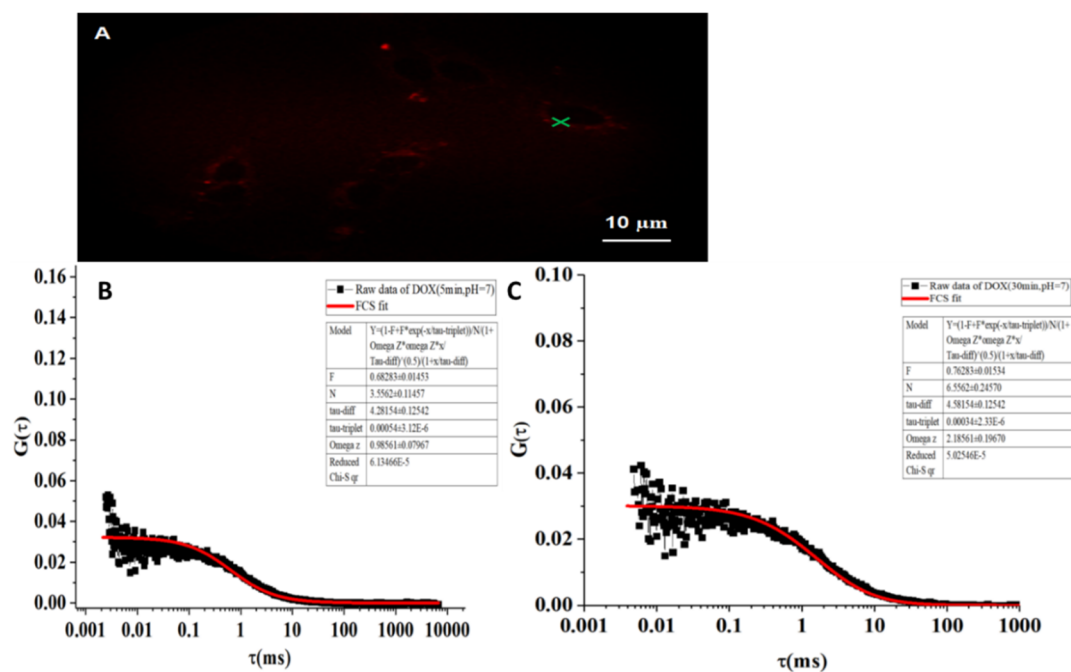

**Figure S11.** Confocal images of CDs, DOX and CDs-DOX in U<sub>2</sub>OS cells from 5 to 60 minutes. Scale bar is 10 μm.

**CDs:**

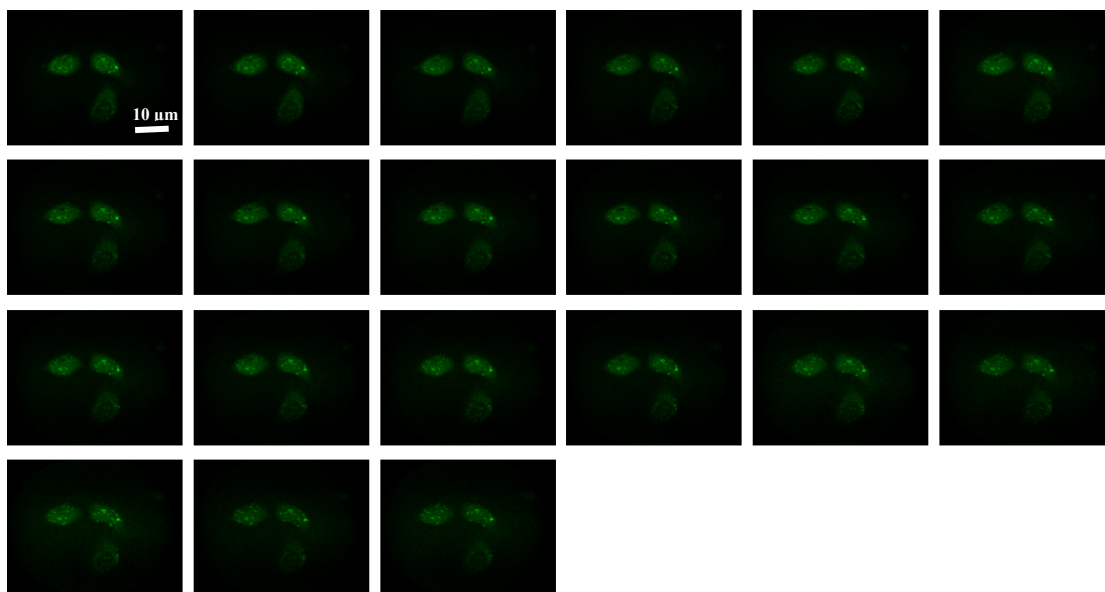

**DOX:**

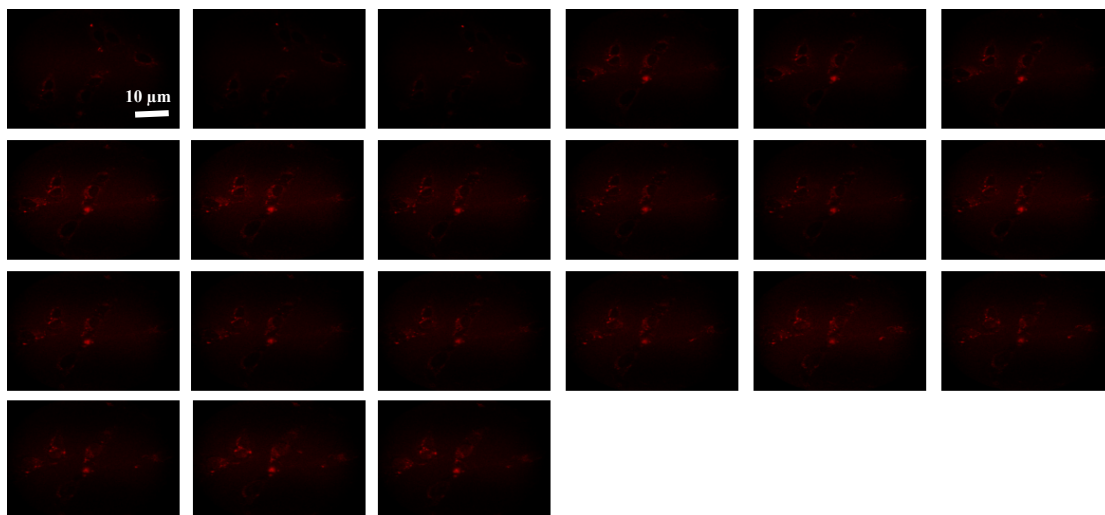

**CDs-DOX:**

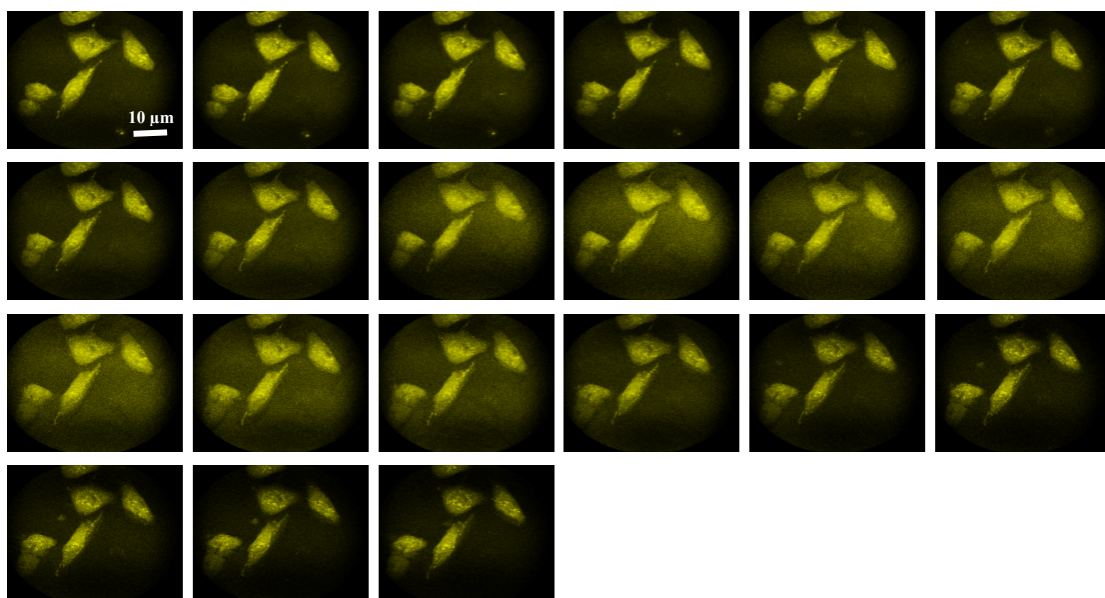

**Figure S12.** Confocal images of CDs, DOX and CDs-DOX in COS7 cells from 5 to 60 minutes. Scale bar is 10 μm.

**CDs:**

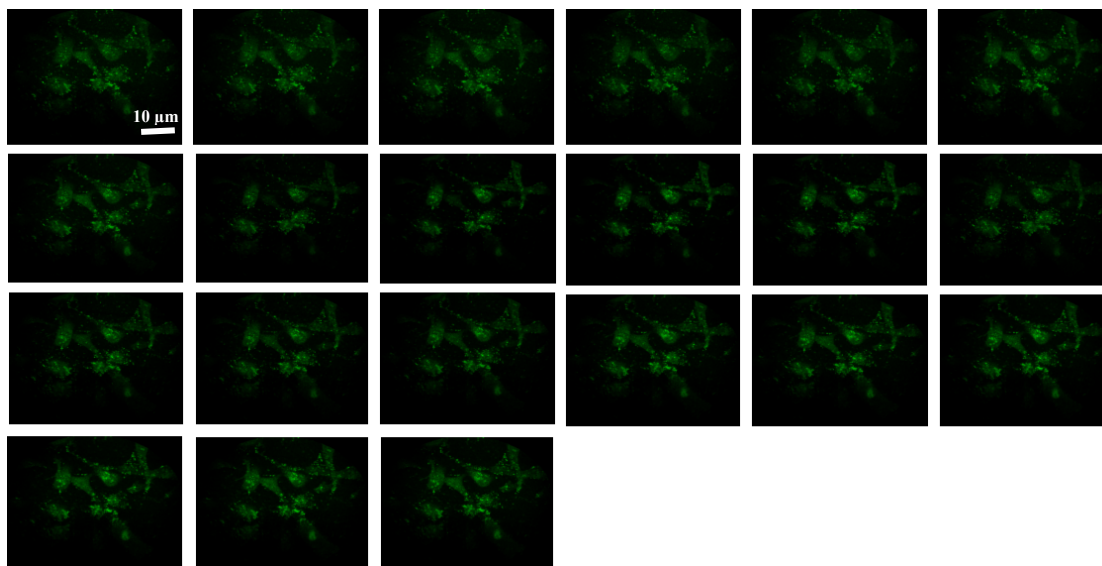

**DOX:**

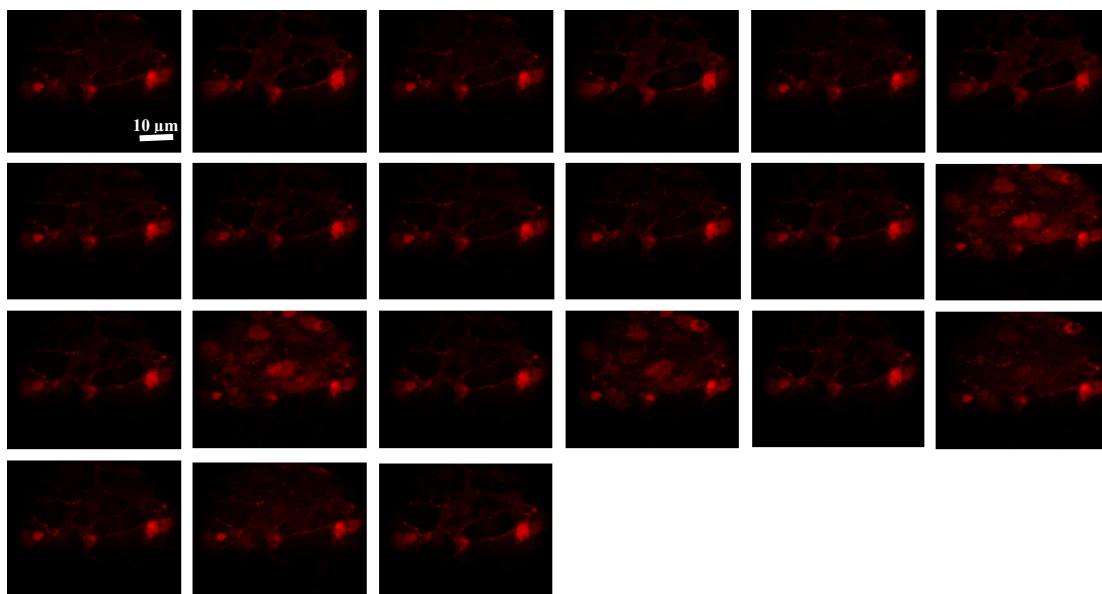

**CDs-DOX:**



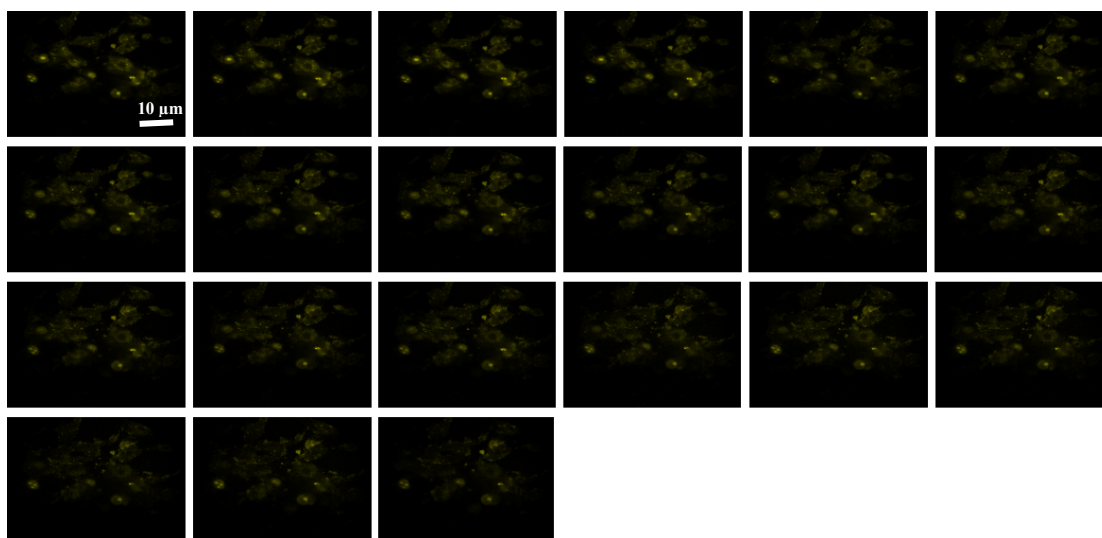

**Figure S13.** Transmembrane transport of CDs, DOX and CDs-DOX at pH6 and pH5 from 5 to 16 minutes.

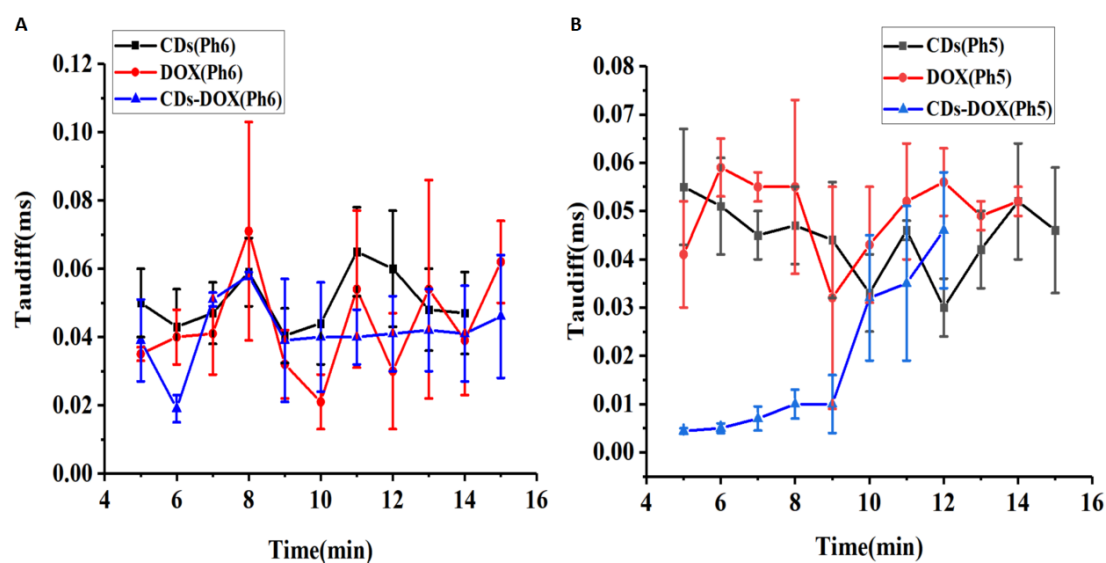

**Figure S14.** The diffusion time of CDs, DOX, CDs-DOX at pH = 5 from 5 min to 8 min in U<sub>2</sub>Os cells.

CDs:

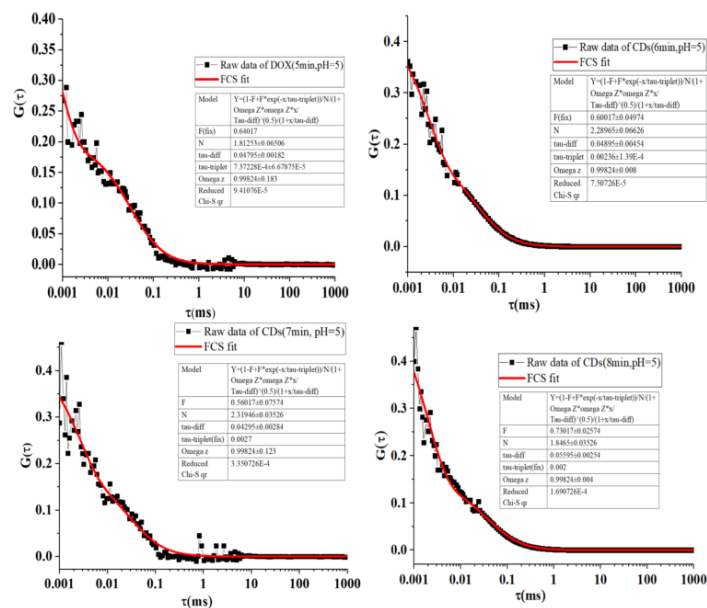

DOX:

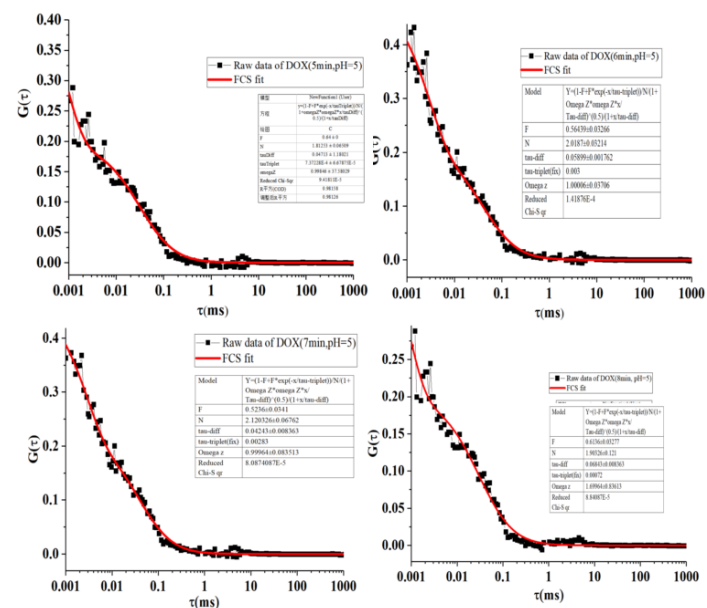

CDs-DOX:

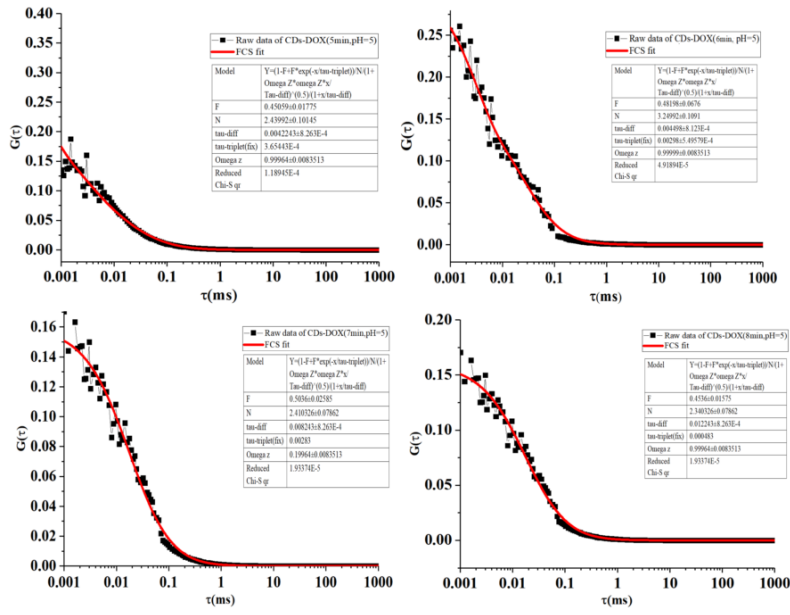

**Figure S15.** Transmembrane transport of CDs, DOX and CDs-DOX under different pH values.

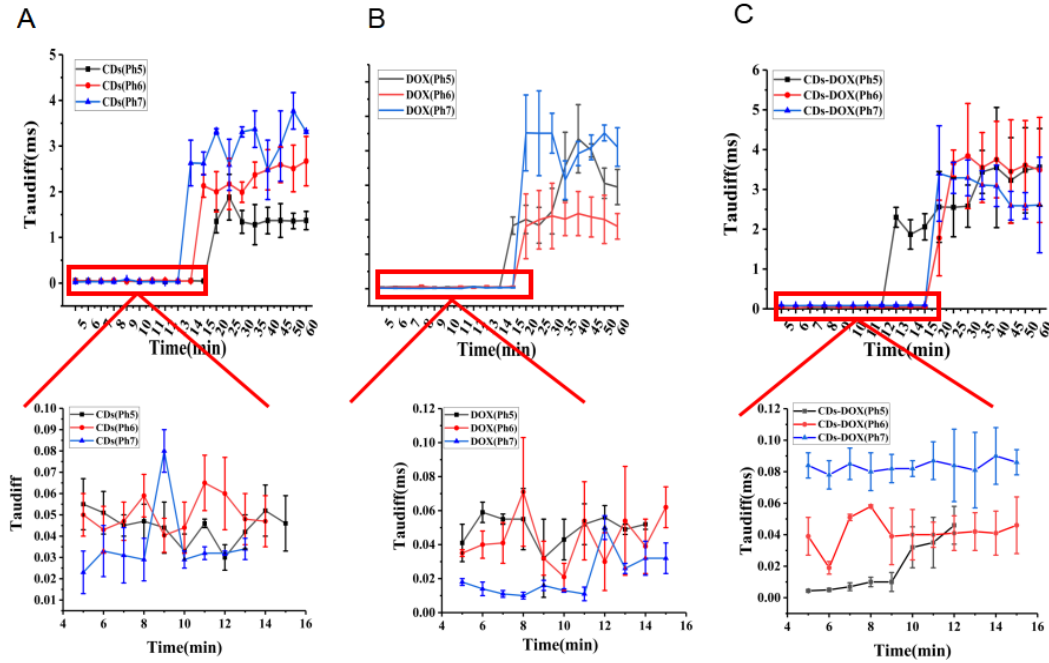

Supplement: s1 [file s1]
